# Supplementary material for: Recent advances in 2D and 3D in vitro systems using primary hepatocytes, alternative hepatocyte sources and non-parenchymal liver cells and their use in investigating mechanisms of hepatotoxicity, cell signaling and ADME
Source: PubMed Central journal article supplement — Arch Toxicol. 2013 Aug 23;87(8):1315–530. doi: 10.1007/s00204-013-1078-5 (PMC3753504; doi:10.1007/s00204-013-1078-5), 2013-08-23
Supplement: 204_2013_1078_MOESM1_ESM.pdf [file 204_2013_1078_MOESM1_ESM.pdf]

**Table S1.** Cellular composition of the liver

| <i>Cell type</i>             | <i>Function</i>                                                                                                                                                                                                                                                                                                                                                                     |
|------------------------------|-------------------------------------------------------------------------------------------------------------------------------------------------------------------------------------------------------------------------------------------------------------------------------------------------------------------------------------------------------------------------------------|
| Hepatocytes                  | Polygon-shaped polarized epithelial cells with abundant microvilli on the apical side. Most cells contain one nucleus. Most of the nuclei are diploid. Hepatocytes are responsible for the metabolic, endocrine, and secretory functions of the liver. The maintenance of hepatocyte metabolism requires an oxygenation of $\sim 1 \text{ nmol/s}/10^6$ cells (Nahmias et al. 2007) |
| Sinusoidal endothelial cells | Specialized endothelial cells. They do not produce basal lamina and form a porous <i>fenestrated</i> barrier. The <i>fenestrae</i> diameter is $\sim 0.1 \text{ }\mu\text{m}$ - $0.3 \text{ }\mu\text{m}$ . An exchange of soluble factors between the hepatocytes and the blood occurs through the <i>fenestrae</i> .                                                              |
| Kupffer cells                | Specialized hepatic macrophages placed on the luminal surface of the sinusoids. They have high endocytic and phagocytic capacity.                                                                                                                                                                                                                                                   |
| Pit cells                    | Natural killer cells, e.g. against tumor cells and viral infections.                                                                                                                                                                                                                                                                                                                |
| Stellate cells               | The myofibroblast stellate cells are in the space of Dissé lying between the hepatocytes and the sinusoids epithelium. They synthesize the ECM, are involved in matrix degradation, contract the sinusoid, regulate the sinusoidal diameter and tone, and store retinoids (e.g. vitamin A). Function as resident mesenchymal stem cells in the liver.                               |
| Portal fibroblasts           | Fibroblasts surrounding the biliary tree.                                                                                                                                                                                                                                                                                                                                           |

**Table S2.** Liver ECM composition

| <i>ECM proteins</i>                                                                        | <i>Liver-specific localization of ECM proteins</i>                                                           |
|--------------------------------------------------------------------------------------------|--------------------------------------------------------------------------------------------------------------|
| Collagen type I                                                                            | Perisinusoidal space, at any point between the portal area and the central vein.                             |
| Collagen type I, III, V, VI                                                                | Interstitialium of the portal area.                                                                          |
| Tenascin                                                                                   | Interstitialium of the portal area.                                                                          |
| Fibronectin                                                                                | Abundant in the space of Disse. Interstitialium of the portal area.                                          |
| Basement membrane (laminin, entactin, perlecan, collagen IV, heparin sulfate proteoglycan) | Portal area (coating the <i>bile ductule</i> , the <i>portal venule</i> , and the <i>hepatic arteriole</i> ) |
| Elastin                                                                                    | Abundant in portal tracts. Not present in the sinusoidal walls.                                              |

Adapted from (Martinez-Hernandez and Amenta 1993; Hunt et al. 2009).

**Table S3.** Effects of  $\beta$ -catenin signaling on the expression of drug metabolism-associated nuclear receptors in murine liver cells: tumors with activated  $\beta$ -catenin (*Ctnnb1*\*), mice with *Alb-Cre*-driven conditional hepatocyte-specific knockout of *Ctnnb1* (*Ctnnb1*<sup>ko</sup>), and Wnt3a-treated hepatocyte cultures *in vitro* (*in vitro* +Wnt). Arrows indicate up- or down-regulation; numbers in brackets indicate relevant literature.

| <b>Gene product</b> | <i>Ctnnb1</i> *                                  | <i>Ctnnb1</i> <sup>ko</sup>                                            | <i>in vitro</i> +Wnt                                 |
|---------------------|--------------------------------------------------|------------------------------------------------------------------------|------------------------------------------------------|
| AhR mRNA            | ↑<br>(Stahl et al. 2005; Braeuning et al. 2007a) | ↓<br>(Braeuning, 2009; Braeuning et al. 2011)                          | ↑<br>(Hailfinger et al. 2006; Braeuning et al. 2011) |
| AhR protein         |                                                  | ↔<br>(Braeuning et al. 2011)                                           |                                                      |
| CAR mRNA            | ↑<br>(Giera et al. 2010)                         | ↓<br>(Braeuning et al. 2009; Giera et al. 2010; Braeuning et al. 2011) | ↔<br>(Braeuning et al. 2011)                         |
| CAR protein         |                                                  | ↓<br>(Braeuning et al. 2011)                                           |                                                      |
| PXR mRNA            |                                                  | ↓<br>(Braeuning 2009)                                                  | ↑<br>(Braeuning et al. 2011)                         |

**Table S4.** Effects of  $\beta$ -catenin signaling on the expression of drug metabolism-associated genes from phase I in murine liver cells: tumors with activated  $\beta$ -catenin (*Ctnnb1*\*), mice with *Alb-Cre*-driven conditional hepatocyte-specific knockout of *Ctnnb1* (*Ctnnb1*<sup>ko</sup>), transgenic mouse hepatocytes with expression of activated human  $\beta$ -Catenin<sup>S33Y</sup> (*CTNNB1*<sup>S33Y</sup>), and Wnt3a-treated hepatocyte cultures *in vitro* (*in vitro* +Wnt). Arrows indicate up- or down-regulation; numbers in brackets indicate relevant literature.

| Gene product  | <i>Ctnnb1</i> *                                    | <i>Ctnnb1</i> <sup>ko</sup>                                                   | <i>CTNNB1</i> <sup>S33Y</sup> | <i>in vitro</i> +Wnt                                       |
|---------------|----------------------------------------------------|-------------------------------------------------------------------------------|-------------------------------|------------------------------------------------------------|
| Cyp1a1 mRNA   | ↑<br>(Loeppen et al. 2005)                         | ↔ / ↑<br>(Sekine et al. 2006; Tan et al. 2006; Braeuning et al. 2009, 2011)   |                               | ↑<br>(Hailfinger et al. 2006; Braeuning et al. 2009, 2011) |
| Cyp1a2 mRNA   | ↑<br>(Braeuning et al. 2007a)                      | ↓<br>(Sekine et al. 2006; Tan et al. 2006; Braeuning et al. 2009, 2011)       |                               | ↑<br>(Braeuning et al. 2011)                               |
| Cyp1a protein | ↑<br>(Loeppen et al. 2005; Schreiber et al. 2011)  | ↓<br>(Sekine et al. 2006; Tan et al. 2006; Braeuning et al. 2009, 2010, 2011) | ↑<br>(Schreiber et al. 2011)  |                                                            |
| Cyp2a4/5 mRNA | ↑<br>(Braeuning et al. 2007a)                      | ↓<br>(Tan et al. 2006)                                                        |                               |                                                            |
| Cyp2b9 mRNA   |                                                    | ↑<br>(Tan et al. 2006)                                                        |                               |                                                            |
| Cyp2b10 mRNA  | ↑<br>(Loeppen et al. 2005; Stahl et al. 2005)      | ↑<br>(Tan et al. 2006; Braeuning et al. 2009)                                 |                               | ↑<br>(Hailfinger et al. 2006; Braeuning et al. 2011)       |
| Cyp2b20 mRNA  | ↑<br>(Stahl et al. 2005)                           |                                                                               |                               |                                                            |
| Cyp2b protein | ↑<br>(Loeppen et al. 2005)                         |                                                                               |                               |                                                            |
| Cyp2c29 mRNA  |                                                    | ↓<br>(Sekine et al. 2006)                                                     |                               |                                                            |
| Cyp2c38 mRNA  | ↑<br>(Braeuning et al. 2007a)                      |                                                                               |                               |                                                            |
| Cyp2c55 mRNA  | ↑<br>(Stahl et al. 2005; Braeuning et al. 2007a)   |                                                                               |                               |                                                            |
| Cyp2c mRNA    |                                                    | ↓<br>(Braeuning et al. 2009, 2010, 2011)                                      |                               | ↑<br>(Braeuning et al. 2011)                               |
| Cyp2c protein | ↑<br>(Loeppen et al. 2005; Hailfinger et al. 2006) | ↓<br>(Braeuning et al. 2009 and 2011)                                         | ↑<br>(Braeuning et al. 2011)  |                                                            |
| Cyp2d9 mRNA   |                                                    | ↓<br>(Tan et al. 2006)                                                        |                               |                                                            |
| Cyp2e1 mRNA   | ↑<br>(Loeppen et al.)                              | ↓<br>(Sekine et al. 2006;                                                     |                               | ↑<br>(Hailfinger et al.)                                   |

|                   |                                                                                    |                                                                                                      |                                                        |                                 |
|-------------------|------------------------------------------------------------------------------------|------------------------------------------------------------------------------------------------------|--------------------------------------------------------|---------------------------------|
|                   | 2005)                                                                              | Tan et al. 2006;<br>Braeuning et al.<br>2011)                                                        |                                                        | 2006; Braeuning et<br>al. 2011) |
| Cyp2e1<br>protein | ↑<br>(Loeppen et al.<br>2005; Hailfinger et<br>al. 2006; Schreiber<br>et al. 2011) | ↓<br>(Sekine, 2006; Tan<br>et al. 2006;<br>Schreiber et al.<br>2011; Braeuning et<br>al. 2010, 2011) | ↑<br>(Schreiber et al. 2011;<br>Braeuning et al. 2011) |                                 |
| Cyp2f2<br>mRNA    | ↓<br>(Stahl et al. 2005;<br>Braeuning et al.<br>2007a)                             | ↑<br>(Braeuning et al.<br>2009)                                                                      |                                                        |                                 |
| Cyp3a11<br>mRNA   |                                                                                    | ↔<br>(Sekine et al. 2006)                                                                            |                                                        |                                 |
| Cyp3a<br>mRNA     |                                                                                    | ↑<br>(Braeuning et al.<br>2009)                                                                      |                                                        | ↑<br>(Braeuning et al.<br>2011) |
| Cyp3a<br>protein  | ↑<br>(Loeppen et al.<br>2005)                                                      | ↑<br>(Braeuning et al.<br>2009)                                                                      |                                                        |                                 |
| Cyp4a14<br>mRNA   |                                                                                    | ↓<br>(Braeuning et al.<br>2009)                                                                      |                                                        |                                 |

**Table S5.** Effects of  $\beta$ -catenin signaling on the expression of drug metabolism-associated genes from phase II in murine liver cells: tumors with activated  $\beta$ -catenin (*Ctnnb1*\*), mice with *Alb-Cre*-driven conditional hepatocyte-specific knockout of *Ctnnb1* (*Ctnnb1*<sup>ko</sup>), transgenic mouse hepatocytes with expression of activated human  $\beta$ -Catenin<sup>S33Y</sup> (*CTNNB1*<sup>S33Y</sup>), and Wnt3a-treated hepatocyte cultures *in vitro* (*in vitro* +Wnt). Arrows indicate up- or down-regulation; numbers in brackets indicate relevant literature.

| Gene product  | <i>Ctnnb1</i> *                                                                           | <i>Ctnnb1</i> <sup>ko</sup>                     | <i>CTNNB1</i> <sup>S33Y</sup> | <i>in vitro</i> +Wnt     |
|---------------|-------------------------------------------------------------------------------------------|-------------------------------------------------|-------------------------------|--------------------------|
| GSTa4 mRNA    | ↑<br>(Stahl et al. 2005; Braeuning et al. 2012)                                           |                                                 |                               |                          |
| GSTa4 protein | ↑<br>(Strathmann et al. 2007)                                                             | ↓<br>(Braeuning, 2012)                          |                               |                          |
| GSTa mRNA     |                                                                                           | ↓<br>(Braeuning et al. 2009)                    |                               |                          |
| GSTk1 mRNA    | ↓<br>(Stahl et al. 2005; Braeuning, 2012)                                                 |                                                 |                               |                          |
| GSTm1 mRNA    | ↑<br>(Stahl et al. 2005; Braeuning et al. 2007a; Braeuning, 2012)                         |                                                 |                               |                          |
| GSTm1 protein | ↑<br>(Strathmann et al. 2007)                                                             | ↓<br>(Braeuning, 2012)                          |                               |                          |
| GSTm2 mRNA    | ↑<br>(Stahl et al. 2005; Braeuning et al. 2007; Giera et al. 2010)                        | ↓<br>(Braeuning et al. 2009; Giera et al. 2010) |                               | ↑<br>(Giera et al. 2010) |
| GSTm2 protein | ↑<br>(Strathmann, 2007)                                                                   |                                                 |                               |                          |
| GSTm3 mRNA    | ↑<br>(Stahl et al. 2005; Braeuning et al. 2007; Giera et al. 2010)                        | ↓<br>(Braeuning et al. 2009; Giera et al. 2010) |                               | ↑<br>(Giera et al. 2010) |
| GSTm4 mRNA    | ↑<br>(Stahl et al. 2005; Braeuning, 2012)                                                 |                                                 |                               |                          |
| GSTm6 mRNA    | ↑<br>(Stahl et al. 2005; Braeuning et al. 2007; Giera et al. 2010)                        | ↓<br>(Braeuning et al. 2009; Giera et al. 2010) |                               | ↑<br>(Giera et al. 2010) |
| GSTm6 protein | ↑<br>(Strathmann et al. 2007)                                                             |                                                 |                               |                          |
| GSTm protein  | ↑<br>(Strathmann et al. 2007; Hailfinger et al. 2006; Giera et al. 2010; Braeuning, 2012) | ↓<br>(Braeuning et al. 2009; Giera et al. 2010) | ↑<br>(Giera et al. 2010)      | ↑<br>(Giera et al. 2010) |
| GSTp1 mRNA    | ↑<br>(Strathmann et al.                                                                   |                                                 |                               |                          |

|             |                                              |                                 |  |  |
|-------------|----------------------------------------------|---------------------------------|--|--|
|             | 2007)                                        |                                 |  |  |
| GSTt2 mRNA  | ↑<br>(Stahl et al. 2005;<br>Braeuning, 2012) |                                 |  |  |
| GSTt3 mRNA  | ↑<br>(Stahl et al. 2005;<br>Braeuning, 2012) |                                 |  |  |
| Ugt1a6 mRNA |                                              | ↓<br>(Braeuning et al.<br>2009) |  |  |

**Table S6.** Composition and enzyme activities [U/mg lyophilisate] of the collagenase P batches from Roche (Mannheim, Germany) (A. Nüssler et al, *unpublished data*).

| Information on Lot | Collagenase Lot number |          |          |         |          |
|--------------------|------------------------|----------|----------|---------|----------|
|                    | 11914427               | 10957731 | 11779821 | 1259322 | 13439520 |
| Date of expiration | 03.2008                | 07.2011  | 06.2012  | 09.2013 | 03.2014  |
| Collagenase [U/mg] | 2.85                   | 2.52     | 1.90     | 1.80    | 1.70     |
| Clostripain [U/mg] | 7.10                   | 32.58    | 33.100   | 21.442  | 32.496   |
| Protease [U/mg]    | 158.0                  | 100.6    | 51.7     | 48.8    | 40.8     |
| Trypsin [U/mg]     | 1.370                  | 2.010    | 4.370    | 4.311   | 2.241    |

**Table S7.** NTP 2006 TCDD Bioassay Histology – MOA and Key Event Possibility for Primary Liver Cell Research.

| Histological Endpoint      | Cancer Bioassay Observations                                                                                                                                                                                                                                                                    | Primary Liver Cell Research Areas and Comments                                                                                                                                                                                                                                                                                                                                                                                                                                                                                                                                                                                                                                                                                                                                                |
|----------------------------|-------------------------------------------------------------------------------------------------------------------------------------------------------------------------------------------------------------------------------------------------------------------------------------------------|-----------------------------------------------------------------------------------------------------------------------------------------------------------------------------------------------------------------------------------------------------------------------------------------------------------------------------------------------------------------------------------------------------------------------------------------------------------------------------------------------------------------------------------------------------------------------------------------------------------------------------------------------------------------------------------------------------------------------------------------------------------------------------------------------|
| Hypertrophy                | <ul style="list-style-type: none"> <li>Statistically significant by 14 weeks at 22 ng/kg/day</li> </ul>                                                                                                                                                                                         | <p>Due largely to core-battery enzyme induction with expansion of smooth endoplasmic reticulum. In-vitro uptake studies for deriving “<i>in-vitro-to-in-vivo</i>” extrapolation could provide estimates of human intake dosages of dioxin to induce enzyme induction.</p>                                                                                                                                                                                                                                                                                                                                                                                                                                                                                                                     |
| Multinucleated Hepatocytes | <ul style="list-style-type: none"> <li>Statistically elevated by 31 weeks at 46 ng/kg/day</li> <li>At two years the 10 ng/kg/day and higher dosages demonstrate statistically significant increases.</li> <li>Multinucleated cells contained 2 and, frequently, more than 10 nuclei.</li> </ul> | <ul style="list-style-type: none"> <li>Is this an adaptive response, analogous to polyploidy, that renders hepatocytes senescent and prone to apoptosis rather than being available for replication and differentiation in to an altered hepatic cell and eventual focus?</li> <li>Is this evidence of AhR-induced dysregulation of cytokinesis?</li> <li>What is the origin of these cells, e.g., old polydiploid hepatocytes, hepatocytes from Zones 1 and 2 reflecting newer cells, or maybe even stem cells? Are there cell markers that could identify where these hepatocytes are originating?</li> <li>Dose-response evaluation of this finding, when coupled to “<i>in-vitro-to-in-vivo</i>” extrapolation could be used to improve human health risk assessment for TCDD.</li> </ul> |
| Pigmentation               | <ul style="list-style-type: none"> <li>By 31 weeks, and at 10 ng/kg/day, this observation was statistically elevated. By 2-years the incidence is still statistically significant at 10 ng/kg/day but not at the lower 3 ng/kg/day dosage.</li> </ul>                                           | <ul style="list-style-type: none"> <li>This suggests an iron-overload, Kupffer cell response, that may reflect AhR-associated inhibition of porphyrin metabolism and the accumulation of porphyrins with enhanced iron accumulation in hepatocytes.</li> <li>Since hematomacrosis is a risk factor in hepatocellular carcinoma this endpoint could be a contributing key event to the overall tumor promotion MOA for sustained AhR activation. Or, it could simply be a by-stander event whereby kupffer cells accumulate iron as they</li> </ul>                                                                                                                                                                                                                                            |

|                       |                                                                                                                                                                                                                                                                                               |                                                                                                                                                                                                                                                                                                                                                                               |
|-----------------------|-----------------------------------------------------------------------------------------------------------------------------------------------------------------------------------------------------------------------------------------------------------------------------------------------|-------------------------------------------------------------------------------------------------------------------------------------------------------------------------------------------------------------------------------------------------------------------------------------------------------------------------------------------------------------------------------|
|                       |                                                                                                                                                                                                                                                                                               | phagocytize hepatocytes damaged by porphyrin-related iron accumulation.                                                                                                                                                                                                                                                                                                       |
| Mixed Cell Focus      | <ul style="list-style-type: none"> <li>Statistically significant by 53 weeks and at 46 ng/kg/day.</li> </ul>                                                                                                                                                                                  | <ul style="list-style-type: none"> <li>Can liver cell culture systems be extended sufficiently in time so that naturally occurring mutations could be promoted with sustained AhR activation?</li> </ul>                                                                                                                                                                      |
| Diffuse Steatosis     | <ul style="list-style-type: none"> <li>Statistically elevated at 100 ng/kg/day by 31 weeks and by 2-years diffuse fat accumulation occurred as low as 10 ng/k/day</li> </ul>                                                                                                                  | <ul style="list-style-type: none"> <li>Non-alcoholic fatty liver disease is a risk factor for liver cancer.</li> <li>Increases in Scd1 in rat hepatocytes could be further studied as a mechanism for fatty acid accumulation (<a href="#">Angrish et al. 2011</a>) for the purposes of dosimetry/risk assessment and for evaluating human versus rat sensitivity.</li> </ul> |
| Bile Duct Fibrosis    | <ul style="list-style-type: none"> <li>Begins to appear by 53 weeks at 46 and 100 ng/kg/day but the observations were not statistically significant. By 2-years, portal fibrosis is statistically elevated at both the 46 and 100 ng/kg/day dosages.</li> </ul>                               | <ul style="list-style-type: none"> <li>The role of stem cells and stellate cells, coupled to changes in stellate cells linked to fibrosis, e.g., reduction in retinoid levels, or in how sustained AhR activation alters normal differentiation of these cell types, e.g., cell surface markers, could be evaluated in primary cultures.</li> </ul>                           |
| Bile Duct Hyperplasia | <ul style="list-style-type: none"> <li>At 53 weeks this was statistically elevated at 100 ng/kg/day. By 2-years, the response was elevated at the 22 ng/kg/day dosages and above.</li> </ul>                                                                                                  | <ul style="list-style-type: none"> <li>The bile duct fibrosis and hyperplasia endpoints could be evaluated together.</li> </ul>                                                                                                                                                                                                                                               |
| Oval cell hyperplasia | <ul style="list-style-type: none"> <li>Elevated by 2-years at dosages of 3, 22, 46 and 100 ng/kg/day but not at 10 ng/kg/day suggesting the 3 ng/kg/day finding is due to chance, e.g., only 2/54 animals.</li> <li>Oval cell hyperplasia was not observed at 53 weeks or earlier.</li> </ul> | <ul style="list-style-type: none"> <li>AhR activation on stem cell biology/differentiation would be invaluable for examining many of the histological observations classified under the term "hepatopathy".</li> </ul>                                                                                                                                                        |



**Table S8.** Authors and their contributions to the review. Each author/institute was asked to write two to three pages on a selected topic. Some contributions were combined due to an overlap of information; therefore, this table lists the topics attributed to each author.

| Author(s)                                                                                | Affiliation and contact email                                                                                                                                                                                                                                                                         | Contribution                                                                                                                                                                                                                                                                                                                                                                                                                                                      |
|------------------------------------------------------------------------------------------|-------------------------------------------------------------------------------------------------------------------------------------------------------------------------------------------------------------------------------------------------------------------------------------------------------|-------------------------------------------------------------------------------------------------------------------------------------------------------------------------------------------------------------------------------------------------------------------------------------------------------------------------------------------------------------------------------------------------------------------------------------------------------------------|
| N. J. Hewitt                                                                             | SWS, Erzhausen, Germany.<br><a href="mailto:nickyhewitttd@yahoo.co.uk">nickyhewitttd@yahoo.co.uk</a>                                                                                                                                                                                                  | Recent advances in methods of cryopreservation of hepatocytes. This author was the main editor of the review and co-author communication.                                                                                                                                                                                                                                                                                                                         |
| P. Godoy<br>J. Hengstler                                                                 | Leibniz Research Centre for Working Environment and Human Factors IFADO, D44139, Dortmund, Germany<br><a href="mailto:Godoy@ifado.de">Godoy@ifado.de</a> , <a href="mailto:Hengstler@ifado.de">Hengstler@ifado.de</a>                                                                                 | Topics covering the dilemma of cultured hepatocytes: the switch from a resting to a proliferation primed state and a second section on cross talk between liver cells during hepatotoxicity with a focus on inflammation and the relevance of non-parenchymal cell types. Also contributed the section on toxicogenomics and in vitro liver toxicity prediction. Contribution to editing and collation of tables and figures, as well as co-author communication. |
| A. Widera,<br>R. Stöber                                                                  | Leibniz Research Centre for Working Environment and Human Factors IFADO, D44139, Dortmund, Germany                                                                                                                                                                                                    | Provided standard operating procedures for the isolation and culture of mouse and rat hepatocytes.                                                                                                                                                                                                                                                                                                                                                                |
| A. Gibson,<br>R. Eakins,<br>C.E.P. Goldring,<br>D. J. Naisbitt,<br>C. Rowe,<br>B.K. Park | Centre for Drug Safety Science, Department of Molecular and Clinical Pharmacology, Institute of Translational Medicine, University of Liverpool, Liverpool, UK<br><a href="mailto:B.K.Park@liverpool.ac.uk">B.K.Park@liverpool.ac.uk</a>                                                              | Perspectives to predict idiosyncratic drug-induced liver injury in vitro: (metabolism and immune-related) mechanisms of DILI and in vitro models and biomarkers.                                                                                                                                                                                                                                                                                                  |
| B. Burkhardt,<br>A.K. Nüssler                                                            | Eberhard Karls University Tübingen, BG Trauma Center, Siegfried Weller Institut, D72076 Tübingen, Germany<br><a href="mailto:Britta.Burkhardt@med.uni-tuebingen.de">Britta.Burkhardt@med.uni-tuebingen.de</a><br><a href="mailto:andreas.nuessler@googlemail.com">andreas.nuessler@googlemail.com</a> | Optimized isolation of human hepatocytes: isolation, culture and transport, as well as their pitfalls and limitations.                                                                                                                                                                                                                                                                                                                                            |
| C. Schelcher,<br>W. E. Thasler                                                           | Ludwig Maximilians University of Munich, Department of Surgery, Liver Regeneration, Core facility - human in vitro models of the liver, Munich, Germany <a href="mailto:Wolfgang.Thasler@med.uni-muenchen.de">Wolfgang.Thasler@med.uni-muenchen.de</a>                                                | These authors also provided an SOP on the isolation of human hepatocytes.                                                                                                                                                                                                                                                                                                                                                                                         |

|                                       |                                                                                                                                                                                                                                                                                                                                                                                                                                                  |                                                                                                                                                                                                             |
|---------------------------------------|--------------------------------------------------------------------------------------------------------------------------------------------------------------------------------------------------------------------------------------------------------------------------------------------------------------------------------------------------------------------------------------------------------------------------------------------------|-------------------------------------------------------------------------------------------------------------------------------------------------------------------------------------------------------------|
| G. Damm,<br>M. Glanemann              | Charité University Medicine Berlin, Department of General-, Visceral- and Transplantation Surgery, D13353 Berlin, Germany                                                                                                                                                                                                                                                                                                                        |                                                                                                                                                                                                             |
| D. Häussinger                         | Clinic for Gastroenterology, Hepatology and Infectious Diseases, Heinrich-Heine-University, Düsseldorf, Germany. Moorenstrasse 5, D40225 Düsseldorf, Germany<br><a href="mailto:verena.keitel@med.uni-duesseldorf.de">verena.keitel@med.uni-duesseldorf.de</a><br><a href="mailto:haeussin@uni-duesseldorf.de">haeussin@uni-duesseldorf.de</a><br><a href="mailto:Johannes.Bode@med.uni-duesseldorf.de">Johannes.Bode@med.uni-duesseldorf.de</a> | The isolated perfused liver                                                                                                                                                                                 |
| V. Keitel                             |                                                                                                                                                                                                                                                                                                                                                                                                                                                  | Bile acid receptors in liver                                                                                                                                                                                |
| J. Bode,<br>U. Albrecht               |                                                                                                                                                                                                                                                                                                                                                                                                                                                  | Communication of liver macrophages and hepatocytes                                                                                                                                                          |
| C.-S. Cho,<br>Y.-J. Choi,<br>B. Singh | Department of Agricultural Biotechnology and Research Institute for Agriculture and Life Sciences, Seoul National University, Seoul 151-921, Korea<br><a href="mailto:chocs@snu.ac.kr">chocs@snu.ac.kr</a>                                                                                                                                                                                                                                       | Effect of 3D scaffolds on hepatocyte functions. Importance of the extracellular matrix and the effect of porosity, galactose ligand and glycosaminoglycan in the 3-D scaffold on hepatocellular behaviours. |
| B. Stieger,<br>C. Guyot               | Department of Clinical Pharmacology and Toxicology, University Hospital, 8091 Zurich, Switzerland<br><a href="mailto:bstieger@kpt.uzh.ch">bstieger@kpt.uzh.ch</a>                                                                                                                                                                                                                                                                                | Transporter polarity of hepatocytes, hepatocyte in vitro systems (sandwich and organoid cultures) in basic research.                                                                                        |
| J. Mwinyi,<br>G.A. Kullak-Ublick      | Department of Clinical Pharmacology and Toxicology, University Hospital, 8091 Zurich, Switzerland<br><a href="mailto:bstieger@kpt.uzh.ch">bstieger@kpt.uzh.ch</a>                                                                                                                                                                                                                                                                                | Transcriptional and microRNA dependent regulation of genes involved in hepatic drug and bile acid metabolism and transport                                                                                  |
| G. Camussi,<br>V. Fonsato             | Department of Medical Sciences, University of Torino, 10126 Turin, Italy<br><a href="mailto:giovanni.camussi@unito.it">giovanni.camussi@unito.it</a>                                                                                                                                                                                                                                                                                             | Isolation and characterization of stem cell populations from human liver                                                                                                                                    |
| C. Tetta                              | Fresenius Medical Care, Bad Homburg, Germany                                                                                                                                                                                                                                                                                                                                                                                                     |                                                                                                                                                                                                             |
| K. Sá Ferreira,                       | GRK 1104 From Cells to Organs, Molecular Mechanisms of Organogenesis, Faculty of Biology, University of Freiburg, Freiburg, Germany                                                                                                                                                                                                                                                                                                              | In vitro hepatocyte systems to study apoptosis in the liver.                                                                                                                                                |
| K. Sá Ferreira,<br>C. Borner          | Institute of Molecular Medicine and Cell Research, University of Freiburg, Freiburg, Germany<br><a href="mailto:christoph.borner@uniklinik-freiburg.de">christoph.borner@uniklinik-freiburg.de</a>                                                                                                                                                                                                                                               |                                                                                                                                                                                                             |
| A. Lutz,<br>K. Schmich,<br>I. Merfort | Department of Pharmaceutical Biology and Biotechnology, University of Freiburg, Freiburg, Germany                                                                                                                                                                                                                                                                                                                                                |                                                                                                                                                                                                             |
| P. Olinga                             | University of Groningen, Department of Pharmacy, Division of Pharmaceutical Technology and Biopharmacy, 9713 AV Groningen, The Netherlands<br><a href="mailto:P.olinga@rug.nl">P.olinga@rug.nl</a>                                                                                                                                                                                                                                               | Precision cut liver slices.                                                                                                                                                                                 |

|                                                                         |                                                                                                                                                                                                                                                                                                                                                                       |                                                                                                                                                                                                                                                                                                 |
|-------------------------------------------------------------------------|-----------------------------------------------------------------------------------------------------------------------------------------------------------------------------------------------------------------------------------------------------------------------------------------------------------------------------------------------------------------------|-------------------------------------------------------------------------------------------------------------------------------------------------------------------------------------------------------------------------------------------------------------------------------------------------|
| A. Ramachandran,<br>H. Jaeschke                                         | Department of Pharmacology, Toxicology & Therapeutics, University of Kansas Medical Center. Kansas City, KS 66160, USA<br><a href="mailto:hjaeschke@kumc.edu">hjaeschke@kumc.edu</a>                                                                                                                                                                                  | Mechanisms of liver injury: intracellular signaling networks controlling drug-induced hepatocyte death and their modulation by culture conditions.                                                                                                                                              |
| V. Rogiers,<br>J. Fraczek,<br>J. Bolleyn,<br>M. Vinken,<br>T. Vanhaecke | Department Of Toxicology, Centre For Pharmaceutical Research, Faculty Of Medicine And Pharmacy, Vrije Universiteit Brussel, B1090 Brussels, Belgium<br><a href="mailto:vrogiers@vub.ac.be">vrogiers@vub.ac.be</a>                                                                                                                                                     | Epigenetic and posttranscriptional mechanisms as novel anti dedifferentiation strategies for primary hepatocytes in culture.                                                                                                                                                                    |
| K. Ito                                                                  | Research Institute of Pharmaceutical Sciences, Musashino University, 1-1-20 Shinmachi, Nishitokyo-shi, Tokyo 202-8585, Japan<br><a href="mailto:k-ito@musashino-u.ac.jp">k-ito@musashino-u.ac.jp</a>                                                                                                                                                                  | Hepatocyte in vitro systems for prediction of specific toxic mechanisms. Drug-drug interactions:                                                                                                                                                                                                |
| Y. Sugiyama                                                             | Sugiyama Laboratory, RIKEN Innovation Center, RIKEN, Yokohama Biopharmaceutical R&D Center, 1-7-22 Suehiro-cho, Tsurumi-ku, Yokohama, Kanagawa 230-0045, Japan<br><a href="mailto:ychi.sugiyama@riken.jp">ychi.sugiyama@riken.jp</a>                                                                                                                                  | prediction of enzyme induction, inhibition, transporter and enzyme interplay, active uptake, and clearance                                                                                                                                                                                      |
| J. Hrach                                                                | FORIM GMBH, D68165 Mannheim, Germany<br><a href="mailto:jenshrach@hotmail.com">jenshrach@hotmail.com</a>                                                                                                                                                                                                                                                              | Toxicogenomics and in vitro liver toxicity prediction.                                                                                                                                                                                                                                          |
| P.G. Hewitt                                                             | Merck KGaA, D64283 Darmstadt, Germany<br><a href="mailto:Philip.Hewitt@merckgroup.com">Philip.Hewitt@merckgroup.com</a>                                                                                                                                                                                                                                               |                                                                                                                                                                                                                                                                                                 |
| S. Messner,<br>J.M. Kelm                                                | InSphero AG, 8952 Schlieren, Switzerland<br><a href="mailto:simon.messner@insphero.com">simon.messner@insphero.com</a><br><a href="mailto:jens.kelm@insphero.com">jens.kelm@insphero.com</a>                                                                                                                                                                          | The hepatosphere model.                                                                                                                                                                                                                                                                         |
| J. Böttger,<br>R. Gebhardt                                              | Institute of Biochemistry, Faculty of Medicine, University of Leipzig, Leipzig, D04103, Leipzig, Germany<br><a href="mailto:jan.boettger@medizin.uni-leipzig.de">jan.boettger@medizin.uni-leipzig.de</a><br><a href="mailto:Rolf.Gebhardt@medizin.uni-leipzig.de">Rolf.Gebhardt@medizin.uni-leipzig.de</a>                                                            | Culture of hepatocytes and non-parenchymal cells on cell culture microchips: Microfluidic in vitro systems – advances and status for a physiologically relevant sinusoid-like liver cell culture device and techniques for isolating pericentral and periportal hepatocytes from rodent livers. |
| M. Matz-Soja,<br>R. Gebhardt                                            | Institute of Biochemistry, Faculty of Medicine, University of Leipzig, Leipzig, Germany. Johannisallee 30, 04103, Leipzig, Germany<br><a href="mailto:Madlen.Matz@medizin.uni-leipzig.de">Madlen.Matz@medizin.uni-leipzig.de</a><br><a href="mailto:Rolf.Gebhardt@medizin.uni-leipzig.de">Rolf.Gebhardt@medizin.uni-leipzig.de</a>                                    | Current techniques for investigating zonal heterogeneity of hepatocytes                                                                                                                                                                                                                         |
| F. Pampaloni,<br>N. Ansari,<br>E. H.K. Stelzer                          | Buchmann Institute for Molecular Life Sciences (BMLS), Goethe University Frankfurt, Max-von-Laue-Str. 15, D60438 Frankfurt am Main, Germany<br><a href="mailto:francesco.pampaloni@physikalischebiologie.de">francesco.pampaloni@physikalischebiologie.de</a><br><a href="mailto:Nariman.Ansari@physikalischebiologie.de">Nariman.Ansari@physikalischebiologie.de</a> | Technological advancements in Bio-engineering and the artificial liver: the importance of the third dimension.                                                                                                                                                                                  |

|                                                                                                                                                      |                                                                                                                                                                                                                                                                                                                                         |                                                                                                                                            |
|------------------------------------------------------------------------------------------------------------------------------------------------------|-----------------------------------------------------------------------------------------------------------------------------------------------------------------------------------------------------------------------------------------------------------------------------------------------------------------------------------------|--------------------------------------------------------------------------------------------------------------------------------------------|
| A. Braeuning,<br>M. Schwarz                                                                                                                          | Institute of Experimental and Clinical Pharmacology and Toxicology, Dept. of Toxicology, Wilhelmstr. 56, 72074 Tübingen, Germany<br><a href="mailto:albert.braeuning@uni-tuebingen.de">albert.braeuning@uni-tuebingen.de</a><br><a href="mailto:michael.schwarz@uni-tuebingen.de">michael.schwarz@uni-tuebingen.de</a>                  | Wnt/ $\beta$ -catenin signaling, an undercover pathway relevant for expression of many important drug metabolizing enzymes in hepatocytes. |
| S. Hoehme,<br>D. Drasdo                                                                                                                              | Interdisciplinary Center for Bioinformatics, University of Leipzig, D04107 Leipzig, Germany; INRIA (French National Institute for Research in Computer Science and Control), 8153 Le Chesnay Cedex, France<br><a href="mailto:dirk.drasdo@inria.fr">dirk.drasdo@inria.fr</a>                                                            | Progress in Systems Biology and image analysis                                                                                             |
| J.J. Xu                                                                                                                                              | Merck & Co, USA<br><a href="mailto:jinghai_xu@merck.com">jinghai_xu@merck.com</a>                                                                                                                                                                                                                                                       | High throughput screening and prediction models for idiosyncratic human hepatotoxicants and the use of image analysis.                     |
| S. Dooley,<br>C. Meyer                                                                                                                               | Department of Medicine II, Section Molecular Hepatology, Medical Faculty Mannheim, Heidelberg University, Mannheim, Germany<br><a href="mailto:steven.dooley@medma.uni-heidelberg.de">steven.dooley@medma.uni-heidelberg.de</a><br><a href="mailto:christoph.meyer@medma.uni-heidelberg.de">christoph.meyer@medma.uni-heidelberg.de</a> | Technological advancements of co-cultures with hepatocytes and non-parenchymal cells and crosstalk with stellate cells.                    |
| L. Gustavsson                                                                                                                                        | Center for Molecular Pathology, Department of Laboratory Medicine (Malmö), Lund University, Jan Waldenströms gata 59, SE-205 02 Malmö, Sweden<br><a href="mailto:Lena.Gustavsson@med.lu.se">Lena.Gustavsson@med.lu.se</a>                                                                                                               | Effect of cryopreservation on transporter function                                                                                         |
| D. Maltman <sup>1</sup> ,<br>A. Hayward <sup>2</sup> ,<br>S.A. Przyborski <sup>1,2</sup>                                                             | (1) Reinnervate Limited, NETPark Incubator, Thomas Wright Way, Sedgefield TS21 3FD, UK;<br>(2) Biological and Biomedical Sciences, Durham University, Durham DH1 3LE, UK<br><a href="mailto:stefan.przyborski@durham.ac.uk">stefan.przyborski@durham.ac.uk</a>                                                                          | Practical applications and features of various methods for routine 3D cell culture of Liver Hepatocytes – natural and synthetic scaffolds. |
| Neil R. Cameron                                                                                                                                      | Department of Chemistry, Durham University, Durham DH13LE, UK                                                                                                                                                                                                                                                                           |                                                                                                                                            |
| D. Hallifax,<br>J.B. Houston                                                                                                                         | Centre for Applied Pharmacokinetic Research (CAPKR), School of Pharmacy and Pharmaceutical Sciences, University of Manchester, Oxford Road, Manchester, M13 9PT, UK<br><a href="mailto:Brian.Houston@manchester.ac.uk">Brian.Houston@manchester.ac.uk</a>                                                                               | Prediction of clearance in the liver                                                                                                       |
| E.L. LeCluyse,<br>S. Bhattacharya,<br>P. McMullen,<br>C.G. Woods,<br>K. M. Yarborough,<br>L. Pluta,<br>P. Lu,<br>J. Dong,<br>J. Pi,<br>M.E. Andersen | The Hamner Institutes for Health Sciences, Research Triangle Park, North Carolina, USA<br><a href="mailto:ELeCluyse@thehamner.org">ELeCluyse@thehamner.org</a><br><a href="mailto:sbhattacharya@thehamner.org">sbhattacharya@thehamner.org</a><br><a href="mailto:mandersen@thehamner.org">mandersen@thehamner.org</a>                  | PPAR $\alpha$ pathway reconstruction in primary human hepatocytes                                                                          |
| E.L. LeCluyse                                                                                                                                        | The Hamner Institutes for Health Sciences, Research Triangle Park, North Carolina, USA<br><a href="mailto:ELeCluyse@thehamner.org">ELeCluyse@thehamner.org</a>                                                                                                                                                                          | Studying the Role of the Aryl Hydrocarbon Receptor and Dioxin                                                                              |

|                                                                    |                                                                                                                                                                                                                                                                                                                                                                                                                 |                                                                                                                                                                                                                                                                      |
|--------------------------------------------------------------------|-----------------------------------------------------------------------------------------------------------------------------------------------------------------------------------------------------------------------------------------------------------------------------------------------------------------------------------------------------------------------------------------------------------------|----------------------------------------------------------------------------------------------------------------------------------------------------------------------------------------------------------------------------------------------------------------------|
| R.A. Budinsky,<br>J. C. Rowlands                                   | Toxicology and Environmental Research & Consulting, The Dow Chemical Company, Midland, Michigan, USA.<br><a href="mailto:JCRowlands@dow.com">JCRowlands@dow.com</a><br><a href="mailto:RABudinsky@dow.com">RABudinsky@dow.com</a>                                                                                                                                                                               | Toxicity in Primary Liver Cells.                                                                                                                                                                                                                                     |
| M. J. Gómez-Lechón <sup>1,2</sup><br>M. T. Donato <sup>1,2,3</sup> | (1) Unidad de Hepatología Experimental. IIS Hospital La Fe, Avda Campanar 21, 46009-Valencia, Spain.<br>(2) CIBERehd, Fondo de Investigaciones Sanitarias, Barcelona, Spain<br>(3) Departamento de Bioquímica y Biología Molecular, Facultad de Medicina, Universidad de Valencia, Spain.<br><a href="mailto:gomez_mjo@gva.es">gomez_mjo@gva.es</a><br><a href="mailto:donato_mte@gva.es">donato_mte@gva.es</a> | Metabolically competent hepatic cells by gene engineering for drug hepatotoxicity testing. The need of metabolically competent hepatic cells for drug hepatotoxicity testing, Cells expressing CYPs and Phase II enzymes permanently/transiently for drug screening. |
| J. Luebke-Wheeler                                                  | <a href="mailto:jluebkwheeler@gmail.com">jluebkwheeler@gmail.com</a>                                                                                                                                                                                                                                                                                                                                            | Stem and Precursor cells: Hepatocyte cells from stem cells                                                                                                                                                                                                           |
| H.-G. Holzhütter                                                   | Universitätsmedizin Berlin (Charité), Institut für Biochemie Abteilung Mathematische Systembiochemie, Charitéplatz 1, D10117 Berlin, Germany<br><a href="mailto:hergo@charite.de">hergo@charite.de</a>                                                                                                                                                                                                          | Metabolic modelling to guide and support experimentation on hepatocytes: use of mathematical models for the interpretation of experimental data and generation of testable hypothesis.                                                                               |
| C. Hellerbrand                                                     | Department of Medicine I; University Hospital Regensburg, D93053 Regensburg, Germany<br><a href="mailto:Claus.Hellerbrand@klinik.uni-regensburg.de">Claus.Hellerbrand@klinik.uni-regensburg.de</a>                                                                                                                                                                                                              | Hepatocellular lipid accumulation in vitro - a model system to study pathophysiological mechanisms in non-alcoholic fatty liver disease.                                                                                                                             |
| U. Dahmen                                                          | Experimental Transplantation Surgery, Department of General, Visceral and Vascular Surgery, Friedrich-Schiller-University Jena, 07745 Jena, Germany<br><a href="mailto:Uta.Dahmen@med.uni-jena.de">Uta.Dahmen@med.uni-jena.de</a>                                                                                                                                                                               | Provided figure 1B                                                                                                                                                                                                                                                   |
| O. Dirsch                                                          | Institute of Pathology, Friedrich-Schiller-University Jena, 07745 Jena, Germany<br><a href="mailto:olaf.dirsch@gmail.com">olaf.dirsch@gmail.com</a>                                                                                                                                                                                                                                                             |                                                                                                                                                                                                                                                                      |
| S. Hammad                                                          | Department of Forensic Medicine and Veterinary Toxicology, Faculty of Veterinary Medicine, South Valley University, Qena, Egypt                                                                                                                                                                                                                                                                                 | Provided staining and confocal imaging of hepatospheres for Figure 18                                                                                                                                                                                                |
| G. Groothuis                                                       | Department of Pharmacy, Pharmacokinetics Toxicology and Targeting, University of Groningen<br>A. Deusinglaan 1, 9713 AV Groningen, The Netherlands<br><a href="mailto:g.m.m.groothuis@rug.nl">g.m.m.groothuis@rug.nl</a>                                                                                                                                                                                        | Transporters                                                                                                                                                                                                                                                         |
